# Supplementary material for: A genomic approach to inferring kinship reveals limited intergenerational dispersal in the yellow fever mosquito
Source: PubMed Central journal article supplement (PMC6790672; doi:10.1111/1755-0998.13043), 2019-06-12
Supplement: MEN-19-1254-s001.pdf [file MEN-19-1254-s001.pdf]

# MOLECULAR ECOLOGY RESOURCES

**Supplemental Information for:**

## **A genomic approach to inferring kinship reveals limited intergenerational dispersal in the yellow fever mosquito**

Moshe Jasper\*, Thomas L. Schmidt\*^, Nazni W. Ahmad, Steven P. Sinkins, Ary A Hoffmann

\*Equal first authors

^ Corresponding Author

### **Table of Contents:**

|                               |               |
|-------------------------------|---------------|
| <b>Supplementary Figure 1</b> | <b>Page 2</b> |
| <b>Supplementary Figure 2</b> | <b>Page 3</b> |
| <b>Supplementary Figure 3</b> | <b>Page 4</b> |
| <b>Supplementary Figure 4</b> | <b>Page 5</b> |

# MOLECULAR ECOLOGY RESOURCES

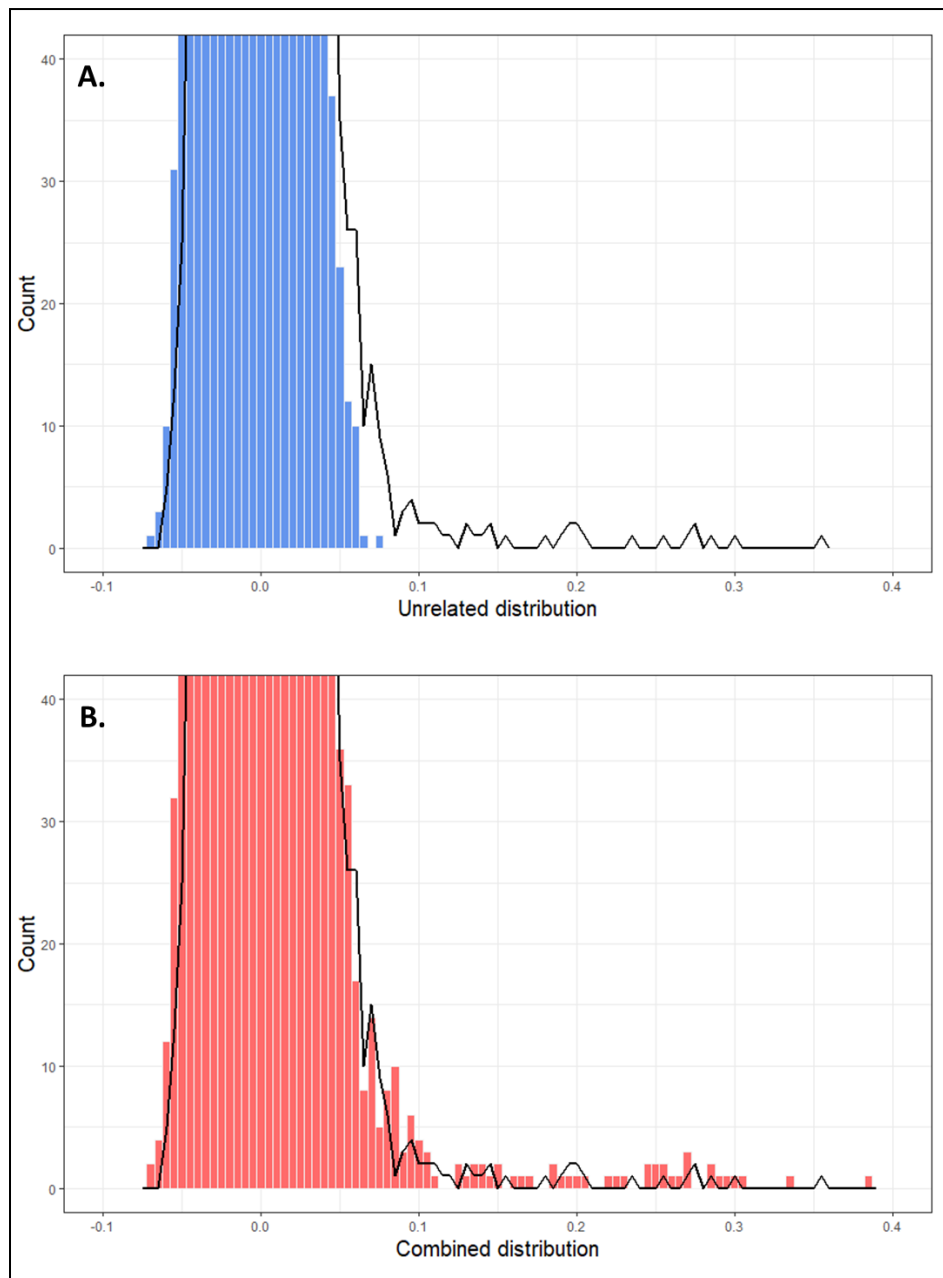

## Supplementary Figure 1

**A** Histogram of unrelated sampling distribution (blue) compared to that of field data (black line).

**B** Histogram of combined sampling distribution (red) compared to that of field data (black line). The combined sampling distribution approximates the field data much more closely than does the unrelated.

# MOLECULAR ECOLOGY RESOURCES

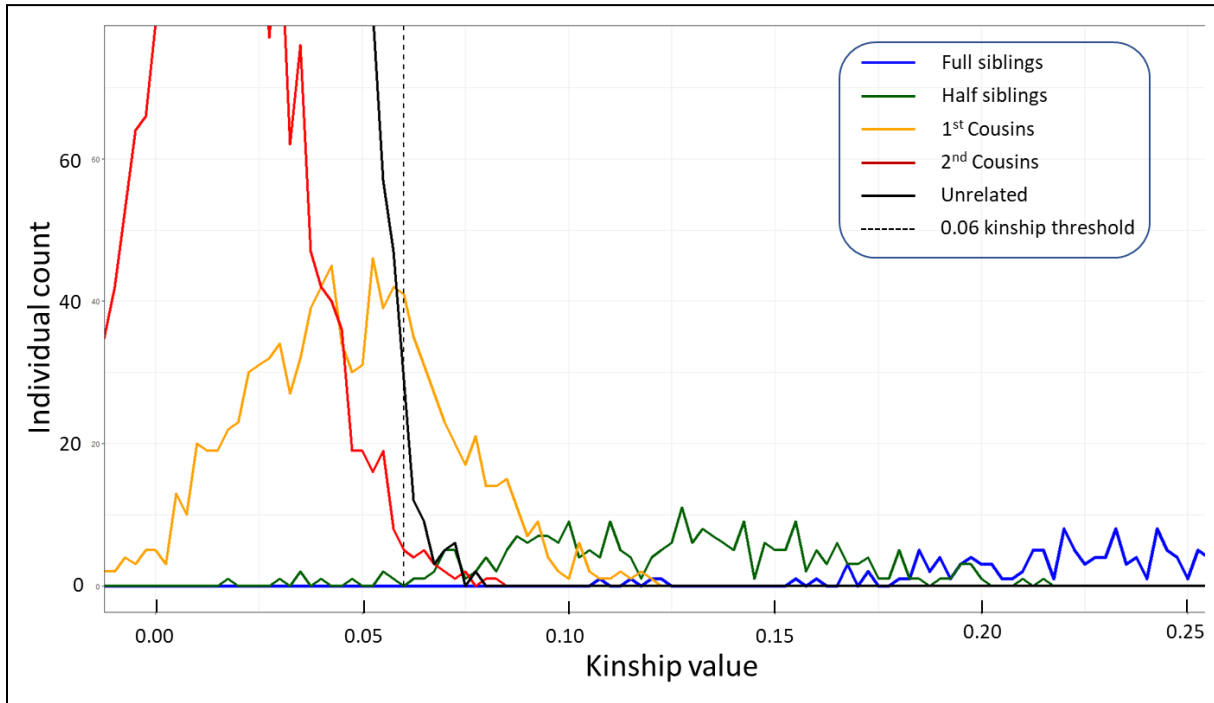

## Supplementary Figure 2

Frequency polygons showing distributions of simulated kinship ( $k$ ) scores. Colours indicate unrelated (black), second cousins (red), first cousins (orange), half-siblings (green), and full-siblings (blue). Dotted vertical line shows the  $k = 0.06$  lower bound for first cousins. Based on these distributions, we no longer considered second cousins.

# MOLECULAR ECOLOGY RESOURCES

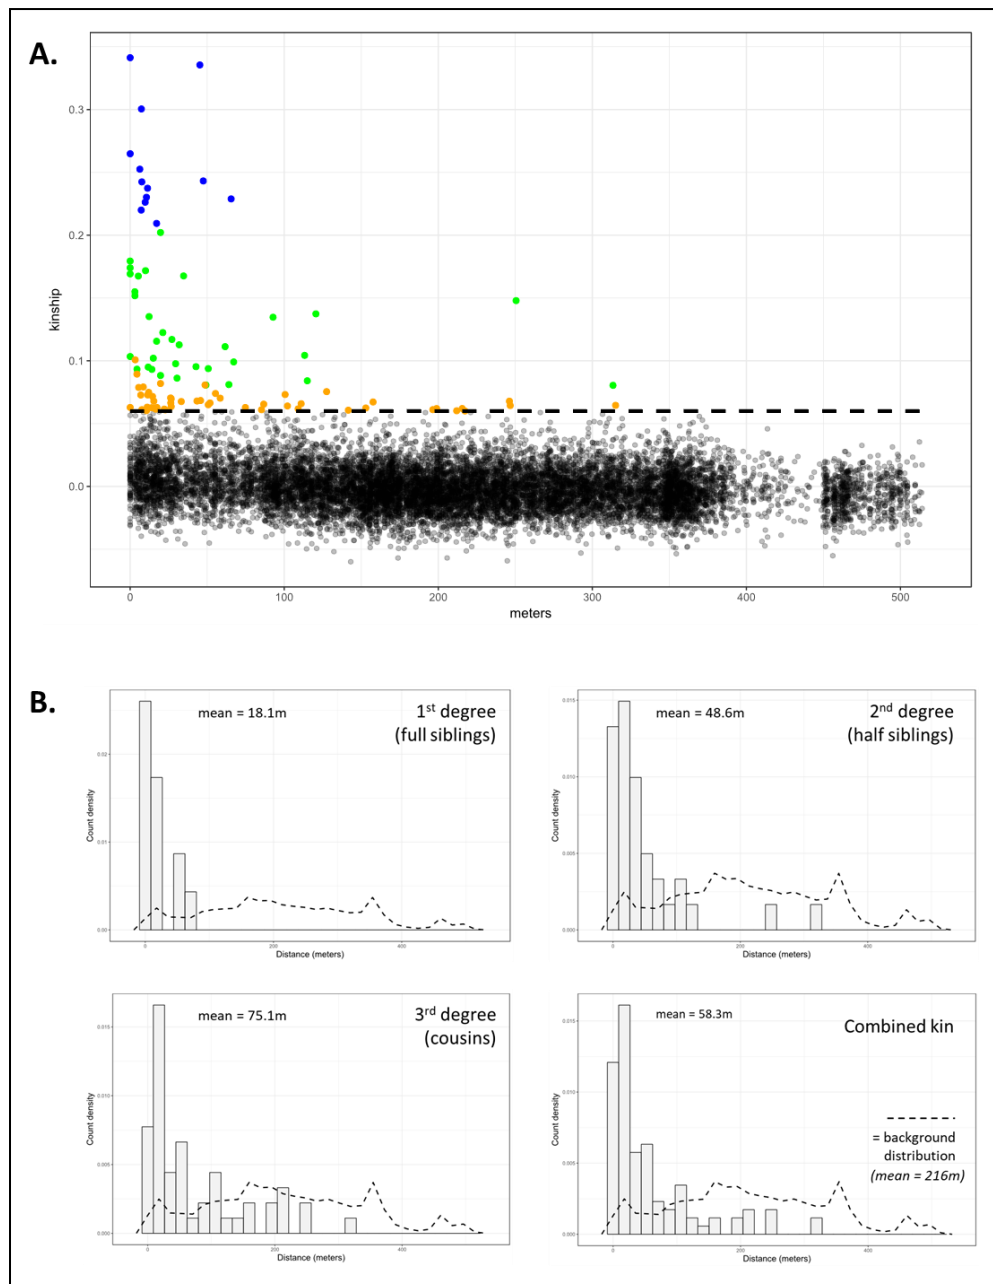

### Supplementary Figure 3

Kin assignment and distribution across distance.

**A** Pairwise Loiselle's  $k$  scores between all individuals relative to distance of separation. Blue = full-siblings, green = half-siblings, orange = cousins, black = unrelated. Dotted line at  $k = 0.06$  shows the lower bound for first cousins.

**B** Histograms of density of each order of kinship (and combined) relative to distance (m). The density distribution of all possible pairwise combinations is shown as a dotted line in each panel for reference.

# MOLECULAR ECOLOGY RESOURCES

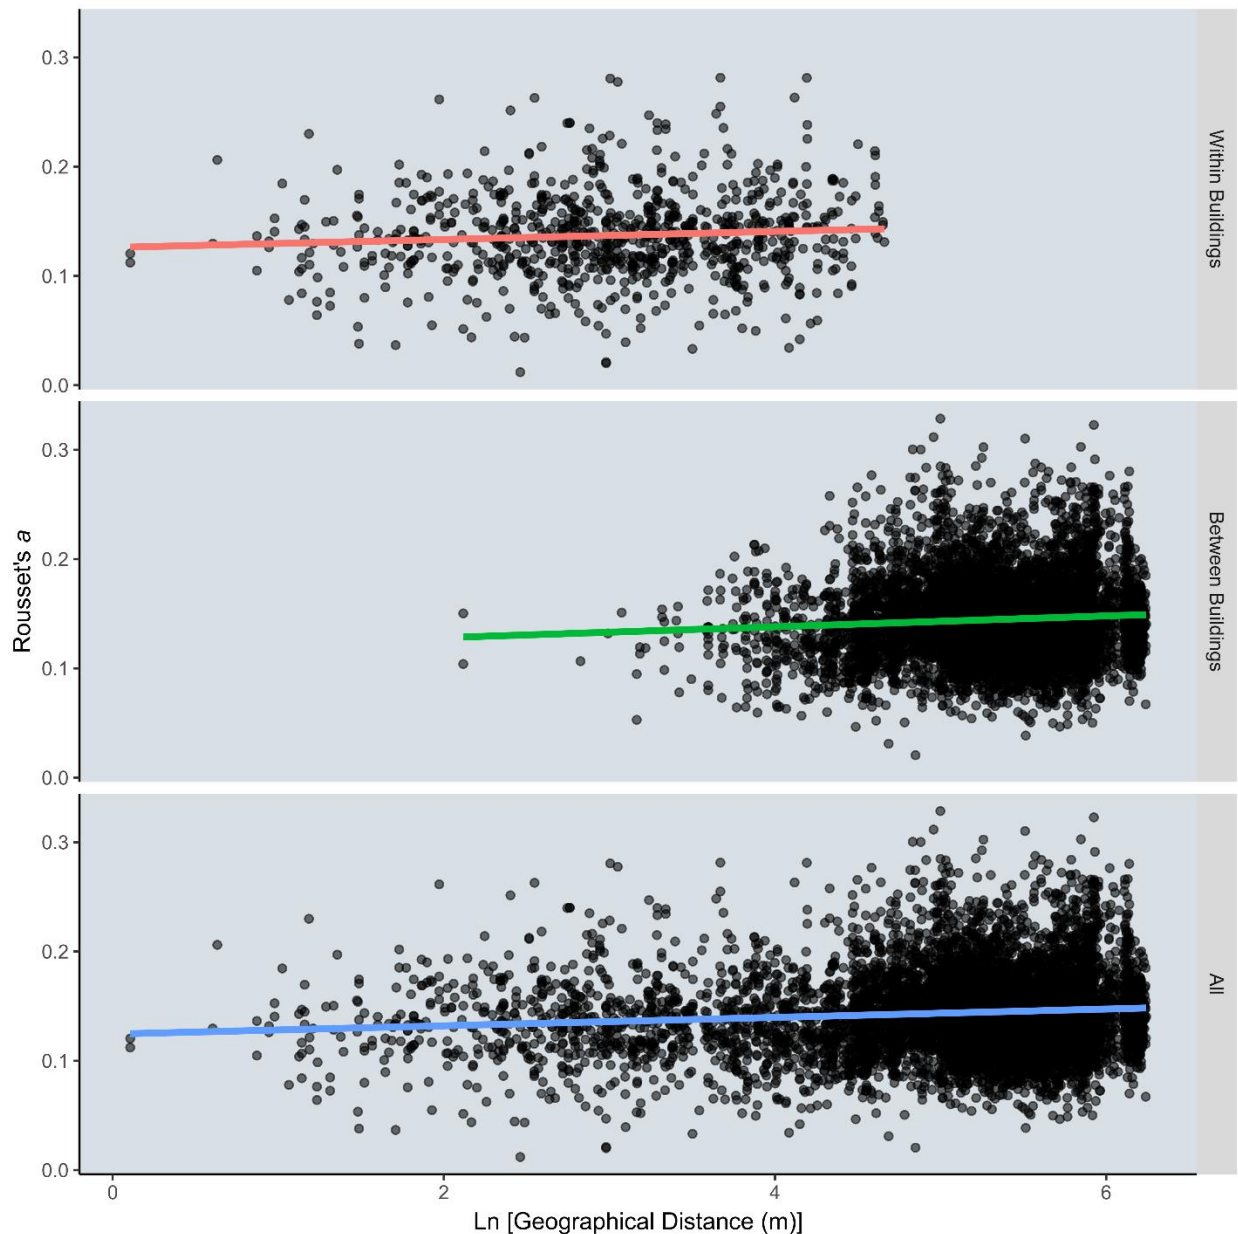

## Supplementary Figure 4

Regressions of pairwise genetic distance (Rousset's  $a$ ) and the natural logarithm of geographical distance for all non-sibling pairs. Regressions for all non-sibling pairs ( $P < 2e^{-16}$ ;  $R^2 = 0.0090$ ; slope = 0.0037), all non-sibling pairs within the same building ( $P = 0.012$ ;  $R^2 = 0.0062$ ; slope = 0.0041), and all non-sibling pairs in different buildings ( $P = 1.3e^{-09}$ ;  $R^2 = 0.0048$ ; slope = 0.00484) all showed significant positive associations between geographical and genetic distances.
